# Supplementary material for: Heavy Metal Cadmium Exposure Promotes Oxidative Stress and Inflammatory Response, Aggravating Stroke Survivor Outcomes via NF-κB Pathway Activation
Source: Research Square preprint supplement (doi:10.21203/rs.3.rs-6197527/v1), 2025-04-01

Table S1. Baseline Characteristics of Participants

| Characteristic | Study Participants | | | |
| --- | --- | --- | --- | --- |
| All (n=1923) | No (n=1562) | Yes (n=361) | *P value* |
| Age | 48.18(0.72) | 47.42(0.67) | 51.93(1.48) | 0.002 |
| BMI | 29.56(0.31) | 29.11(0.34) | 31.78(0.39) | < 0.001 |
| HDL | 1.41(0.01) | 1.42(0.01) | 1.41(0.01) | 0.51 |
| HS.CRP | 3.80(0.24) | 3.44(0.23) | 5.57(0.70) | 0.01 |
| Total.Cholesterol | 4.92(0.04) | 4.95(0.04) | 4.78(0.07) | 0.05 |
| Vitamin.D | 79.75(1.56) | 79.68(1.53) | 80.06(2.86) | 0.88 |
| Glucose | 5.95(0.06) | 5.88(0.05) | 6.28(0.11) | 0.001 |
| Lead [(umol/L)](https://wwwn.cdc.gov/Nchs/Nhanes/2021-2022/PBCD_L.htm#LBDBPBSI) | 0.04(0.00) | 0.04(0.00) | 0.04(0.00) | 0.2 |
| Cadmium [(ug/L)](https://wwwn.cdc.gov/Nchs/Nhanes/2021-2022/PBCD_L.htm#LBXBPB) | 3.23(0.15) | 2.98(0.14) | 4.45(0.28) | < 0.0001 |
| Manganese [(ug/L)](https://wwwn.cdc.gov/Nchs/Nhanes/2021-2022/PBCD_L.htm#LBXBPB) | 171.46(2.60) | 171.99(2.86) | 168.84(2.93) | 0.35 |
| Selenium [(umol/L)](https://wwwn.cdc.gov/Nchs/Nhanes/2021-2022/PBCD_L.htm#LBDBPBSI) | 2.31(0.01) | 2.32(0.01) | 2.26(0.02) | 0.01 |
| Mercury [(nmol/L)](https://wwwn.cdc.gov/Nchs/Nhanes/2021-2022/PBCD_L.htm#LBDBPBSI) | 6.31(0.56) | 6.65(0.63) | 4.62(0.50) | 0.01 |
| LeadQ |  |  |  | 0.86 |
| Q1 | 641(39.11) | 522(39.10) | 119(39.14) |  |
| Q2 | 640(32.60) | 523(32.85) | 117(31.36) |  |
| Q3 | 642(28.30) | 517(28.05) | 125(29.50) |  |
| CadmiumQ |  |  |  | < 0.0001 |
| Q1 | 638(38.53) | 556(41.04) | 82(26.10) |  |
| Q2 | 646(32.30) | 532(32.32) | 114(32.19) |  |
| Q3 | 639(29.17) | 474(26.63) | 165(41.72) |  |
| ManganeseQ |  |  |  | 0.83 |
| Q1 | 641(33.04) | 522(32.81) | 119(34.15) |  |
| Q2 | 638(33.51) | 523(33.59) | 115(33.12) |  |
| Q3 | 644(33.45) | 517(33.59) | 127(32.73) |  |
| SeleniumQ |  |  |  | 0.01 |
|  |  |  |  |  |
| Q1 | 663(33.57) | 516(32.02) | 147(41.21) |  |
| Q2 | 615(33.03) | 507(33.47) | 108(30.85) |  |
| Q3 | 645(33.41) | 539(34.51) | 106(27.94) |  |
| MercuryQ |  |  |  | 0.001 |
| Q1 | 650(35.72) | 499(33.55) | 151(46.43) |  |
| Q2 | 639(32.90) | 524(33.39) | 115(30.43) |  |
| Q3 | 634(31.39) | 539(33.05) | 95(23.14) |  |
| Sex |  |  |  | 0.01 |
| Male | 858(49.09) | 725(50.76) | 133(40.83) |  |
| Female | 1065(50.91) | 837(49.24) | 228(59.17) |  |
| Ethnic |  |  |  | 0.72 |
| Non-Hispanic White | 1240(65.65) | 1017(65.74) | 223(65.22) |  |
| Non-Hispanic Black | 183 (8.81) | 146(8.72) | 37(9.27) |  |
| Mexican American | 129(6.92) | 111(7.16) | 18(5.72) |  |
| Other | 371(18.62) | 288(18.38) | 83(19.79) |  |
| Marital |  |  |  | < 0.001 |
| Unmarried or other | 810(34.70) | 612(32.35) | 198(46.33) |  |
| Married or living with a partner | 1113(65.30) | 950(67.65) | 163(53.67) |  |
| Education |  |  |  | < 0.0001 |
|  | 172(6.95) | 104(5.32) | 68(14.97) |  |
| ≥High school | 1751(93.05) | 1458(94.68) | 293(85.03) |  |
| Poverty_ratio |  |  |  | < 0.0001 |
| Below Poverty line (<1.00) | 212(9.05) | 140(7.19) | 72(18.27) |  |
| At or above Poverty line (≥1.00) | 1711(90.95) | 1422(92.81) | 289(81.73) |  |
| Smoke |  |  |  | < 0.0001 |
| Never | 1201(65.84) | 1027(68.77) | 174(51.35) |  |
| Former | 479(21.68) | 377(20.91) | 102(25.46) |  |
| Current | 243(12.48) | 158(10.31) | 85(23.20) |  |
| Alcohol.use |  |  |  | < 0.0001 |
| No | 188(9.06) | 131(8.12) | 57(13.71) |  |
| Yes | 1735(90.94) | 1431(91.88) | 304(86.29) |  |
| Hypertension |  |  |  | < 0.0001 |
| No | 1250(70.36) | 1073(73.65) | 177(54.11) |  |
| Yes | 673(29.64) | 489(26.35) | 184(45.89) |  |
| Asthma |  |  |  | 0.01 |
| No | 1600(83.88) | 1315(84.85) | 285(79.09) |  |
| Yes | 323(16.12) | 247(15.15) | 76(20.91) |  |
| Arthritis |  |  |  | < 0.0001 |
| No | 1324(75.01) | 1147(79.04) | 177(55.11) |  |
| Yes | 599(24.99) | 415(20.96) | 184(44.89) |  |
| Congestive.Heart.Failure |  |  |  | < 0.001 |
| No | 1874(98.28) | 1536(98.83) | 338(95.57) |  |
| Yes | 49(1.72) | 26(1.17) | 23(4.43) |  |
| Coronary.Heart.Disease |  |  |  | 0.03 |
| No | 1834(96.59) | 1499(97.00) | 335(94.59) |  |
| Yes | 89(3.41) | 63(3.00) | 26(5.41) |  |
| Thyroid.Problem |  |  |  | 0.15 |
| No | 1690(90.12) | 1383(90.73) | 307(87.06) |  |
| Yes | 233(9.88) | 179(9.27) | 54(12.94) |  |
| COPD |  |  |  | < 0.001 |
| No | 1821(96.16) | 1509(97.43) | 312(89.86) |  |
| Yes | 102(3.84) | 53(2.57) | 49(10.14) |  |
| liver.Condition |  |  |  | < 0.0001 |
| No | 1832(96.12) | 1508(97.36) | 324(89.94) |  |
| Yes | 91(3.88) | 54(2.64) | 37(10.06) |  |
| Cancer |  |  |  | 0.04 |
| No | 1635(89.02) | 1341(89.80) | 294(85.18) |  |
| Yes | 288(10.98) | 221(10.20) | 67(14.82) |  |
| Kidney.Disease |  |  |  | < 0.0001 |
| No | 1874(97.89) | 1542(99.17) | 332(91.56) |  |
| Yes | 49(2.11) | 20(0.83) | 29(8.44) |  |
| PHQ9 |  |  |  | < 0.0001 |
| No | 1692(88.56) | 1460(93.64) | 232(63.47) |  |
| Yes | 231(11.44) | 102(6.36) | 129(36.53) |  |
| Age |  |  |  | 0.01 |
| 20-29 | 217(17.24) | 184(17.70) | 33(14.96) |  |
| 30-39 | 290(18.23) | 252(19.53) | 38(11.78) |  |
| 40-49 | 273(17.16) | 232(17.96) | 41(13.21) |  |
| 50-59 | 297(18.10) | 229(16.97) | 68(23.68) |  |
| 60-69 | 482(16.45) | 384(15.95) | 98(18.90) |  |
| ≥70 | 364(12.82) | 281(11.88) | 83(17.48) |  |
| BMI |  |  |  | < 0.0001 |
| 18.5-30.0 | 1141(59.25) | 972(61.73) | 169(46.96) |  |
| <18.5 | 14(0.70) | 11(0.69) | 3(0.75) |  |
| ≥30.0 | 768(40.05) | 579(37.58) | 189(52.29) |  |

This table provides weighted estimates of participants' baseline characteristics, representing US population demographics and considering the National Health and Nutrition Examination Survey's complex sampling design. UCR stands for urinary creatinine; BMI stands for body mass index (calculated as weight in kilograms divided by height in meters squared).

Table S2. Discriminative Features of 11 Machine Learning Models in the Testing Set

| Characteristics | SVM | NN | MLP | GP | GBM | LR | NB | XGB | C5.0 | KNN | RF |
| --- | --- | --- | --- | --- | --- | --- | --- | --- | --- | --- | --- |
| Apparent prevalence | 0.89 (0.86, 0.92) | 0.91 (0.88, 0.94) | 0.89 (0.85, 0.92) | 0.95 (0.93, 0.97) | 0.92 (0.89, 0.94) | 0.91 (0.88, 0.94) | 0.79 (0.75, 0.83) | 0.92 (0.89, 0.94) | 0.91 (0.87, 0.93) | 0.99 (0.97, 1.00) | 0.96 (0.93, 0.97) |
| True prevalence | 0.81 (0.77, 0.85) | 0.81 (0.77, 0.85) | 0.81 (0.77, 0.85) | 0.81 (0.77, 0.85) | 0.81 (0.77, 0.85) | 0.81 (0.77, 0.85) | 0.81 (0.77, 0.85) | 0.81 (0.77, 0.85) | 0.81 (0.77, 0.85) | 0.81 (0.77, 0.85) | 0.81 (0.77, 0.85) |
| Sensitivity | 0.96 (0.93, 0.98) | 0.97 (0.94, 0.98) | 0.96 (0.93, 0.98) | 0.99 (0.98, 1.00) | 0.97 (0.95, 0.99 | 0.97 (0.94, 0.98) | 0.86 (0.82, 0.90) | 0.97 (0.94, 0.98) | 0.96 (0.93, 0.98) | 1.00 (0.98, 1.00 | 0.99 (0.97, 1.00) |
| Specificity | 0.39 (0.28, 0.51) | 0.32 (0.21, 0.44) | 0.42 (0.30, 0.54) | 0.22 (0.13, 0.34) | 0.31 (0.20, 0.43) | 0.33 (0.23, 0.45) | 0.50 (0.38, 0.62) | 0.29 (0.19, 0.41) | 0.32 (0.21, 0.44) | 0.04 (0.01, 0.12) | 0.19 (0.11, 0.30) |
| PPV | 0.87 (0.83, 0.91) | 0.86 (0.82, 0.89) | 0.88 (0.84, 0.91) | 0.85 (0.81, 0.88) | 0.86 (0.82, 0.89) | 0.86 (0.82, 0.90) | 0.88 (0.84, 0.92) | 0.86 (0.81, 0.89) | 0.86 (0.82, 0.89) | 0.82 (0.78, 0.86) | 0.84 (0.80, 0.88) |
| NPV | 0.68 (0.52, 0.82) | 0.70 (0.51, 0.84) | 0.68 (0.52, 0.81) | 0.89 (0.65, 0.99) | 0.71 (0.52, 0.86) | 0.71 (0.53, 0.85) | 0.45 (0.34, 0.57) | 0.68 (0.49, 0.83) | 0.64 (0.46, 0.79) | 0.75 (0.19, 0.99) | 0.82 (0.57, 0.96) |
| PLR | 1.57 (1.30, 1.89) | 1.42 (1.21, 1.67) | 1.64 (1.34, 1.99) | 1.28 (1.13, 1.45) | 1.40 (1.20, 1.63) | 1.45 (1.23, 1.71) | 1.72 (1.36, 2.17) | 1.37 (1.18, 1.59) | 1.41 (1.20, 1.65) | 1.04 (0.99, 1.09) | 1.23 (1.10, 1.38) |
| NLR | 0.11 (0.06, 0.20) | 0.10 (0.05, 0.20) | 0.11 (0.06, 0.19) | 0.03 (0.01, 0.12) | 0.09 (0.05, 0.20) | 0.10 (0.05, 0.19) | 0.28 (0.20, 0.40) | 0.11 (0.05, 0.22) | 0.13 (0.07, 0.24) | 0.08 (0.01, 0.73) | 0.05 (0.01, 0.17) |

The table below compares the discriminative features of 11 machine learning models without data augmentation. Abbreviations: SVM stands for Support Vector Machine; NN stands for Neural Network; MLP stands for Multi-Layer Perceptron; GP stands for Gaussian Process; GBM stands for Gradient Boosting Machine; LR stands for Logistic Regression; NB stands for Naive Bayes; XGB stands for XGBoost; C5.0 stands for C5.0 Decision Trees; KNN stands for K-Nearest Neighbor; RF stands for Random Forest; PPV stands for Positive Predictive Value; NPV stands for Negative Predictive Value; PLR stands for Positive Likelihood Ratio; NLR stands for Negative Likelihood Ratio.

Table S3. Initial Generalized Linear Regression Model Assessing the Impact of Heavy Metals and Demographic Factors on Disability Outcomes in Stroke Survivors

| Response Variable | Model Formula | Coefficient | Lower CI | Upper CI | P-Value |
| --- | --- | --- | --- | --- | --- |
| Model 1 | Lead | -0.185 | -0.379 | 0.005 | 0.059 |
| cadmium | 0.56 | 0.404 | 0.718 | <0.001 |
| manganese | -0.13 | -0.486 | 0.225 | 0.474 |
| selenium | -1.129 | -2.053 | -0.236 | 0.015 |
| mercury | -0.187 | -0.293 | -0.082 | 0.001 |
| Model 2 | Lead | -0.323 | -0.549 | -0.102 | 0.005 |
| cadmium | 0.514 | 0.348 | 0.681 | <0.001 |
| manganese | -0.096 | -0.459 | 0.265 | 0.602 |
| selenium | -1.07 | -1.987 | -0.188 | 0.02 |
| mercury | -0.193 | -0.3 | -0.087 | <0.001 |
| Model 3 | Lead | -0.26 | -0.514 | -0.011 | 0.043 |
| cadmium | 0.348 | 0.143 | 0.554 | <0.001 |
| manganese | -0.176 | -0.586 | 0.232 | 0.398 |
| selenium | -0.863 | -1.91 | 0.15 | 0.101 |
| mercury | -0.073 | -0.195 | 0.049 | 0.243 |

This table presents the results of generalized linear regression models examining the relationship between heavy metals and stroke survivors. Model 1 includes only the five heavy metals as predictors. Model 2 incorporates additional covariates for sex and age. Model 3 expands the analysis further by including a comprehensive set of variables: age, sex, ethnicity, marital status, smoking status, alcohol use, body mass index (BMI), high-density lipoprotein (HDL) levels, and various health conditions, including hypertension, asthma, arthritis, congestive heart failure, coronary heart disease, thyroid problems, chronic obstructive pulmonary disease (COPD), liver conditions, cancer, high-sensitivity C-reactive protein (HS-CRP), total cholesterol, vitamin D levels, glucose, kidney disease, and the Patient Health Questionnaire-9 (PHQ9) score, as well as the poverty ratio.

Table S4 Generalized Linear Regression Analysis of Heavy Metal Concentrations in Stroke Survivors

| **Response Variable** | **Concentration Level** | **Model Formula** | **Coefficient** | **Lower CI** | **Upper CI** | **P-Value** |
| --- | --- | --- | --- | --- | --- | --- |
| Model 1 | Q1 | lead | Ref | Ref | Ref | Ref |
| Q2 | lead | -0.089 | -0.3874 | 0.2089 | 0.5582 |
| Q3 | lead | -0.1612 | -0.4719 | 0.149 | 0.3085 |
| Q1 | cadmium | Ref | Ref | Ref | Ref |
| Q2 | cadmium | 0.4428 | 0.1265 | 0.7631 | 0.0064 |
| Q3 | cadmium | 0.9334 | 0.6196 | 1.2537 | 8.95E-09 |
| Q1 | manganese | Ref | Ref | Ref | Ref |
| Q2 | manganese | -0.0407 | -0.3324 | 0.2508 | 0.7843 |
| Q3 | manganese | -0.0369 | -0.3252 | 0.2515 | 0.802 |
| Q1 | selenium | Ref | Ref | Ref | Ref |
| Q2 | selenium | -0.2837 | -0.5691 | -0.0009 | 0.0502 |
| Q3 | selenium | -0.2628 | -0.5507 | 0.0229 | 0.0724 |
| Q1 | mercury | Ref | Ref | Ref | Ref |
| Q2 | mercury | -0.3359 | -0.6159 | -0.0582 | 0.0182 |
| Q3 | mercury | -0.5212 | -0.8194 | -0.2268 | 0.0006 |
|  | Q1 | lead | Ref | Ref | Ref | Ref |
| Model 2 | Q2 | lead | -0.2251 | -0.5442 | 0.0928 | 0.1658 |
| Q3 | lead | -0.3307 | -0.6778 | 0.0155 | 0.0615 |
| Q1 | cadmium | Ref | Ref | Ref | Ref |
| Q2 | cadmium | 0.2973 | -0.0306 | 0.6286 | 0.0768 |
| Q3 | cadmium | 0.7786 | 0.4495 | 1.1134 | 4.47E-06 |
| Q1 | manganese | Ref | Ref | Ref | Ref |
| Q2 | manganese | -0.041 | -0.3341 | 0.2518 | 0.7837 |
| Q3 | manganese | -0.0313 | -0.3225 | 0.26 | 0.833 |
| Q1 | selenium | Ref | Ref | Ref | Ref |
| Q2 | selenium | -0.2468 | -0.5341 | 0.0382 | 0.0909 |
| Q3 | selenium | -0.2236 | -0.5137 | 0.0645 | 0.1294 |
| Q1 | mercury | Ref | Ref | Ref | Ref |
| Q2 | mercury | -0.3632 | -0.645 | -0.0837 | 0.0112 |
| Q3 | mercury | -0.5218 | -0.8213 | -0.226 | 0.0006 |
|  | Q1 | lead | Ref | Ref | Ref | Ref |
| Model 3 | Q2 | lead | -0.0833 | -0.4417 | 0.2749 | 0.6482 |
| Q3 | lead | -0.142 | -0.5392 | 0.2553 | 0.4833 |
| Q1 | cadmium | Ref | Ref | Ref | Ref |
| Q2 | cadmium | 0.3402 | -0.0226 | 0.7064 | 0.0672 |
| Q3 | cadmium | 0.6041 | 0.2232 | 0.9895 | 0.002 |
| Q1 | manganese | Ref | Ref | Ref | Ref |
| Q2 | manganese | -0.0283 | -0.3569 | 0.2998 | 0.8656 |
| Q3 | manganese | -0.0707 | -0.3982 | 0.2564 | 0.6716 |
| Q1 | selenium | Ref | Ref | Ref | Ref |
| Q2 | selenium | -0.1872 | -0.511 | 0.1347 | 0.2556 |
| Q3 | selenium | -0.1525 | -0.4826 | 0.1759 | 0.3636 |
| Q1 | mercury | Ref | Ref | Ref | Ref |
| Q2 | mercury | -0.3177 | -0.6351 | -0.0025 | 0.049 |
| Q3 | mercury | -0.177 | -0.5134 | 0.1576 | 0.3007 |

This table displays the results of generalized linear regression models investigating the relationship between categorized concentrations of five heavy metals and stroke survivors. The concentrations of each metal are divided into three quartiles (Q1, Q2, and Q3) to assess their impact on outcomes. Model 1 includes only these categorized metal concentrations as predictors. Model 2 adds covariates for sex and age. Model 3 further expands the analysis by incorporating a comprehensive set of variables, including age, sex, ethnicity, marital status, smoking status, alcohol use, body mass index (BMI), high-density lipoprotein (HDL) levels, and various health conditions such as hypertension, asthma, arthritis, congestive heart failure, coronary heart disease, thyroid problems, chronic obstructive pulmonary disease (COPD), liver conditions, cancer, high-sensitivity C-reactive protein (HS-CRP), total cholesterol, vitamin D levels, glucose, kidney disease, and the Patient Health Questionnaire-9 (PHQ9) score, along with the poverty ratio.

Figure S1. Partial Dependence of 5 Heavy Metals (A-E) on Stroke Prediction Probabilities Using LIME


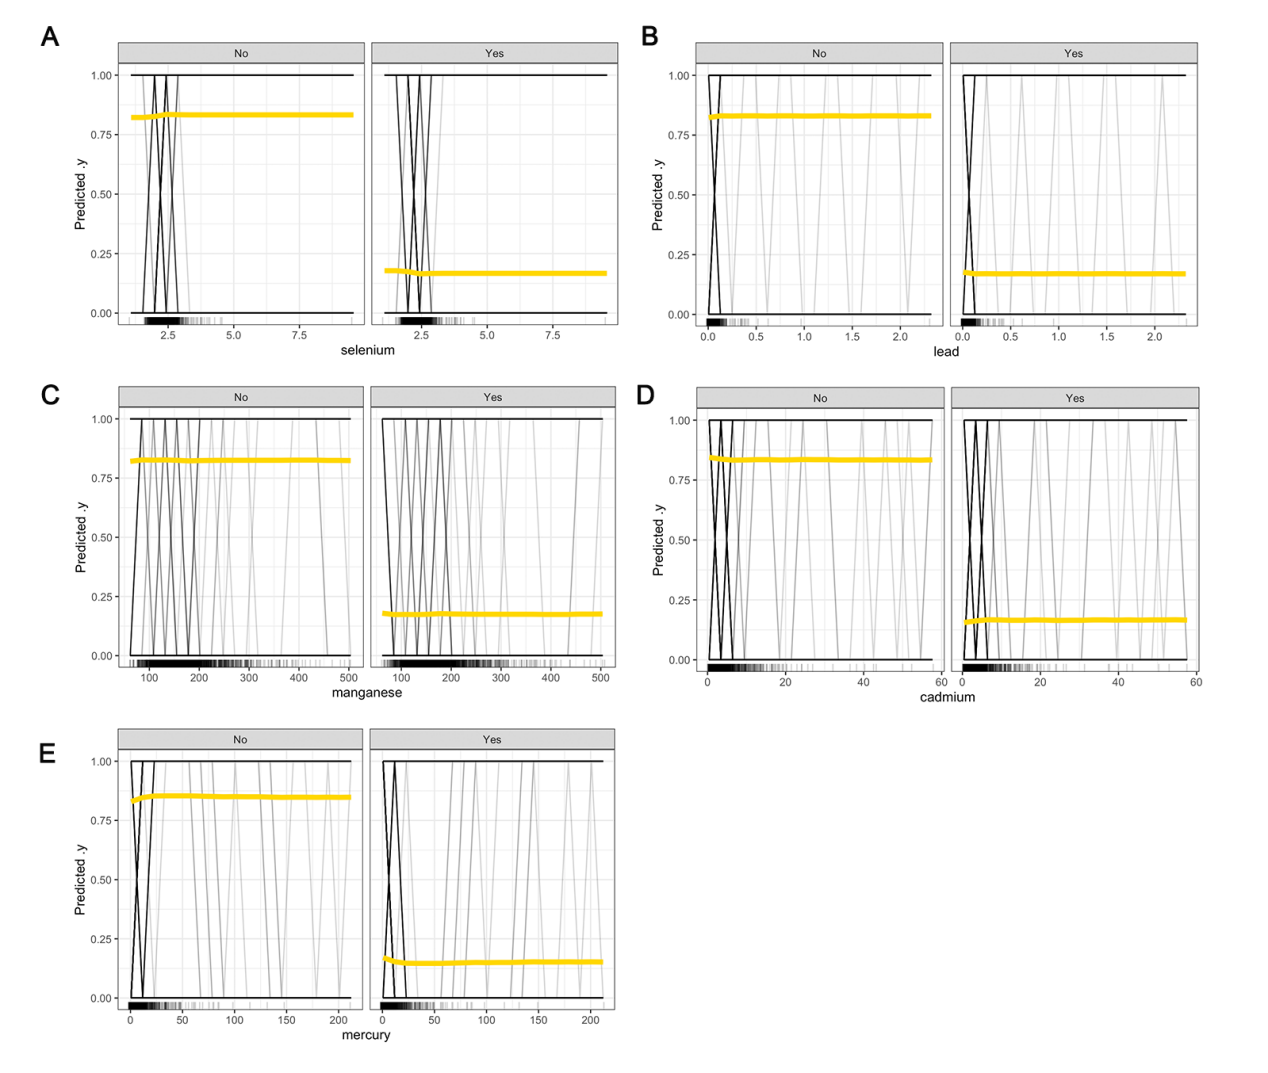


Figure S2. Accumulated Local Effects (ALE) of Heavy Metals and Health Factors on Stroke Survival Prediction


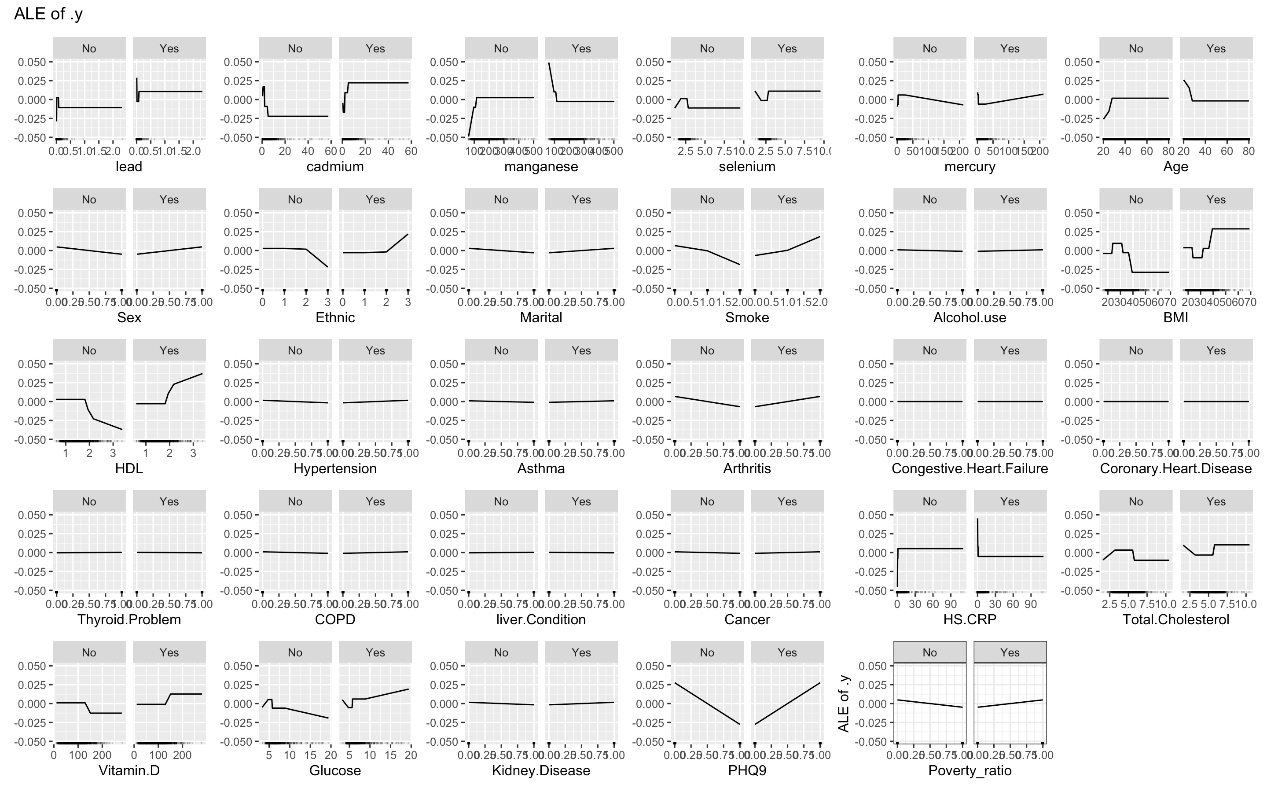


Figure S3. Results of Pearson's correlation analysis among heavy metal factors.


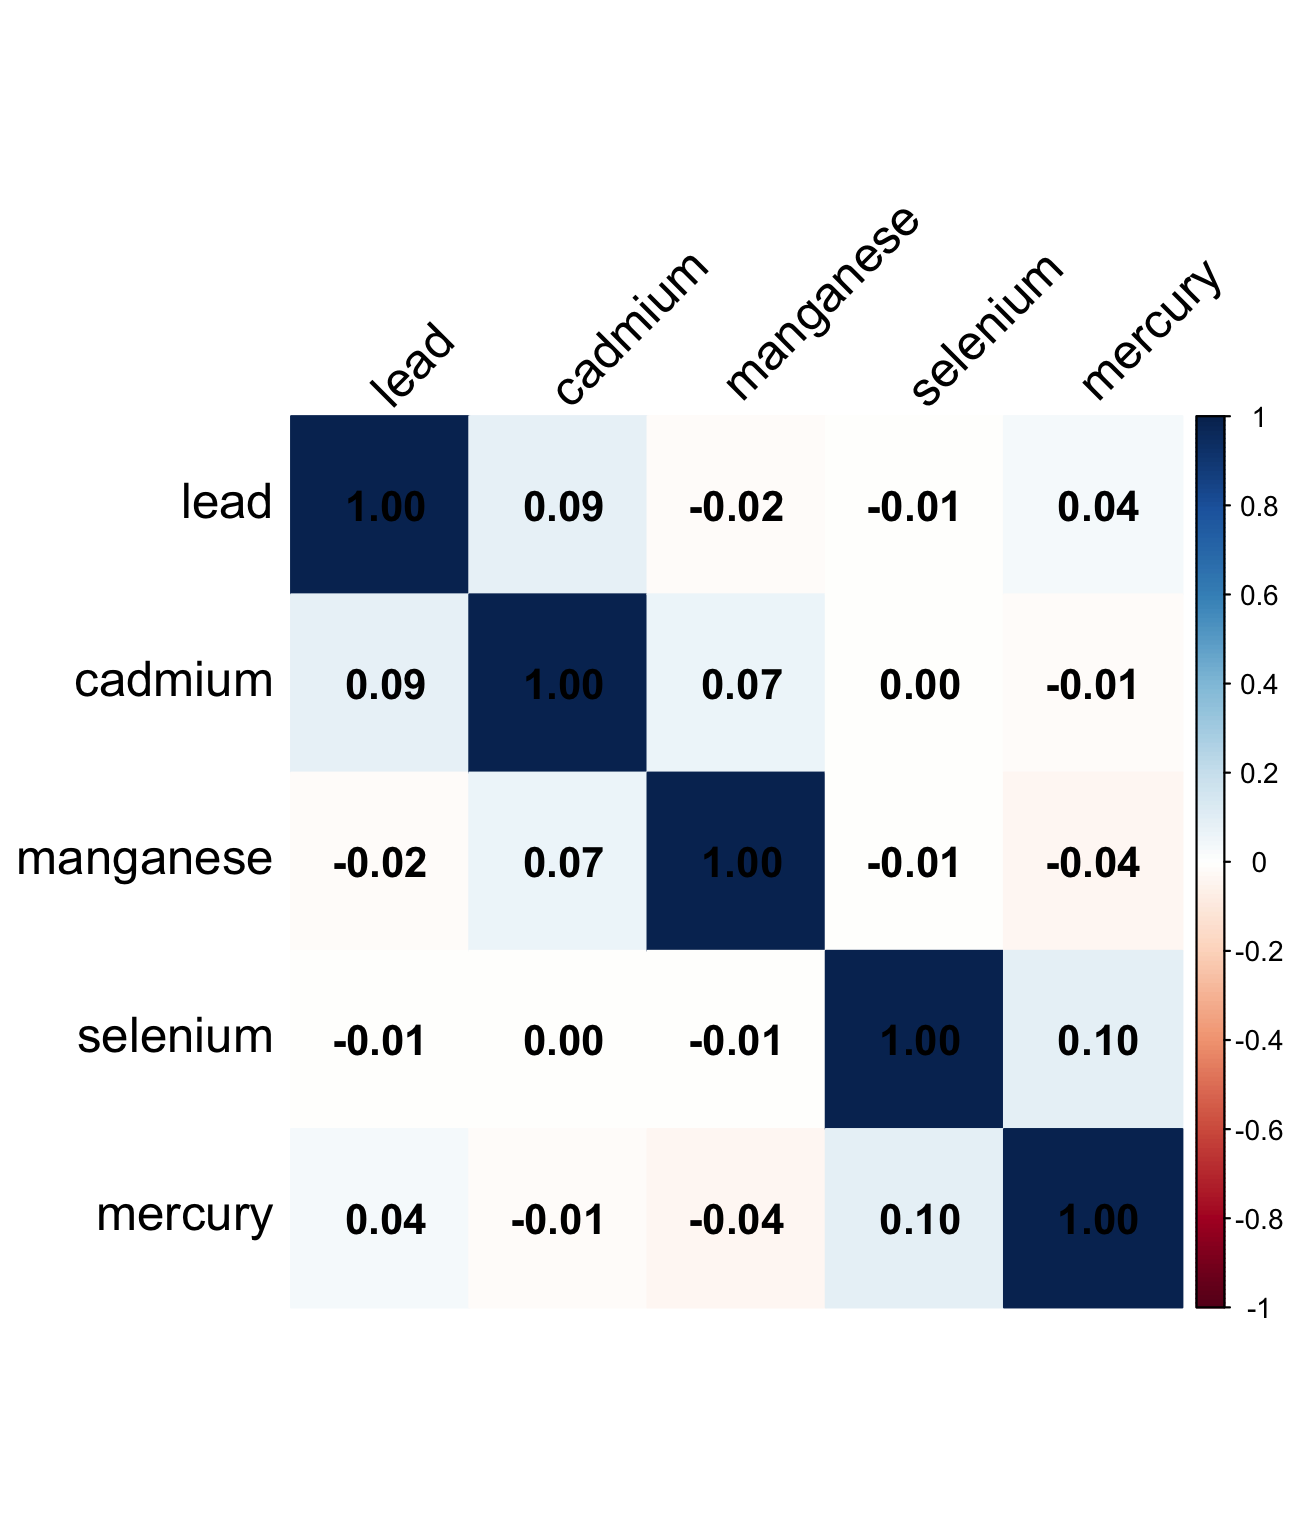


Figure S4. Predictive model contribution of metal factors and baseline variables. (A) A stroke prediction model based on LIME features and weights (B) Based on LIME analysis, the forest map shows the contribution weights and standard deviations of heavy metals and baseline variables.


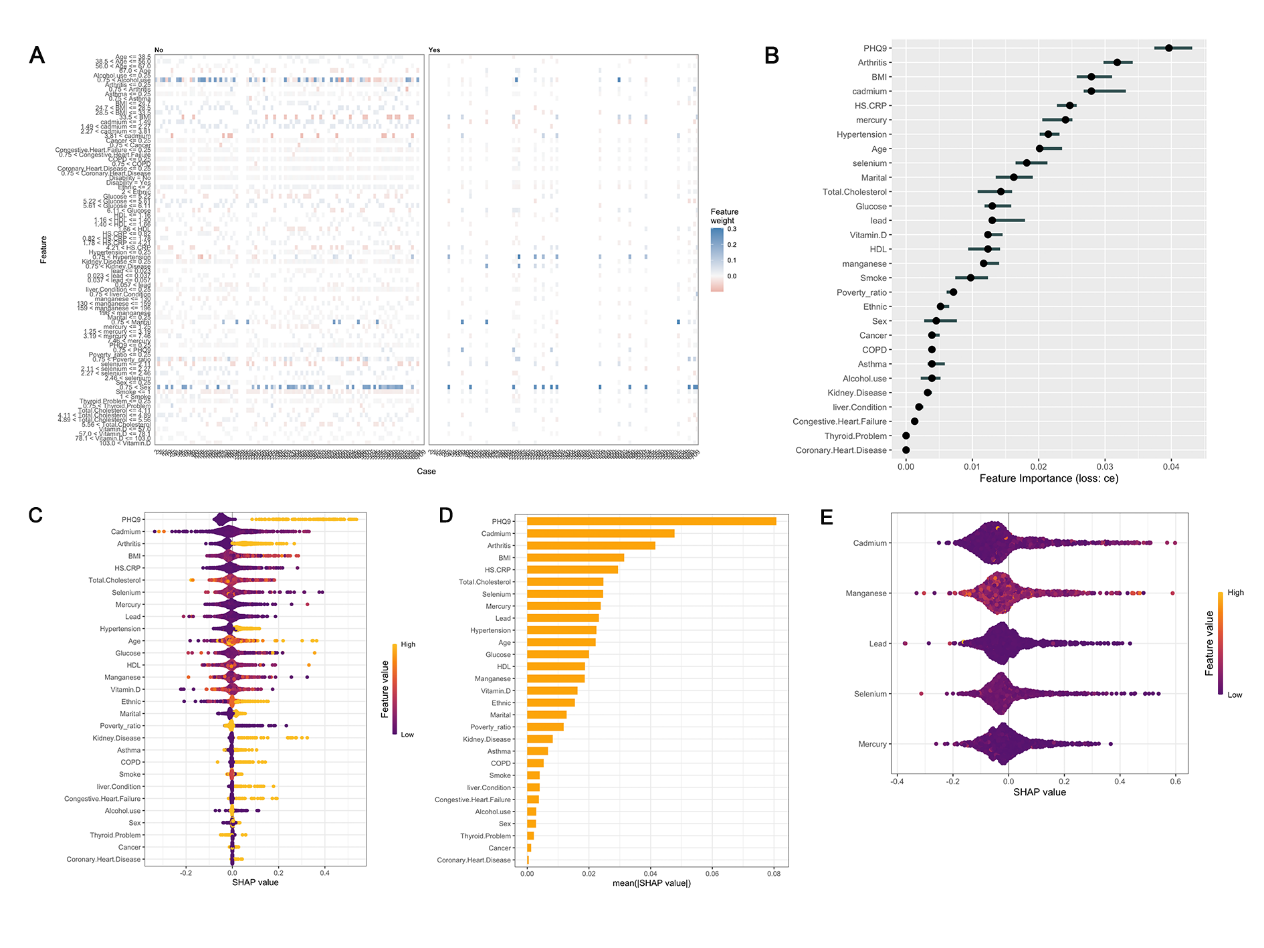


Figure S5 SHAP Dependence Analysis of 5 Heavy Metals (A-E) on Stroke Survivors' Risk Prediction.


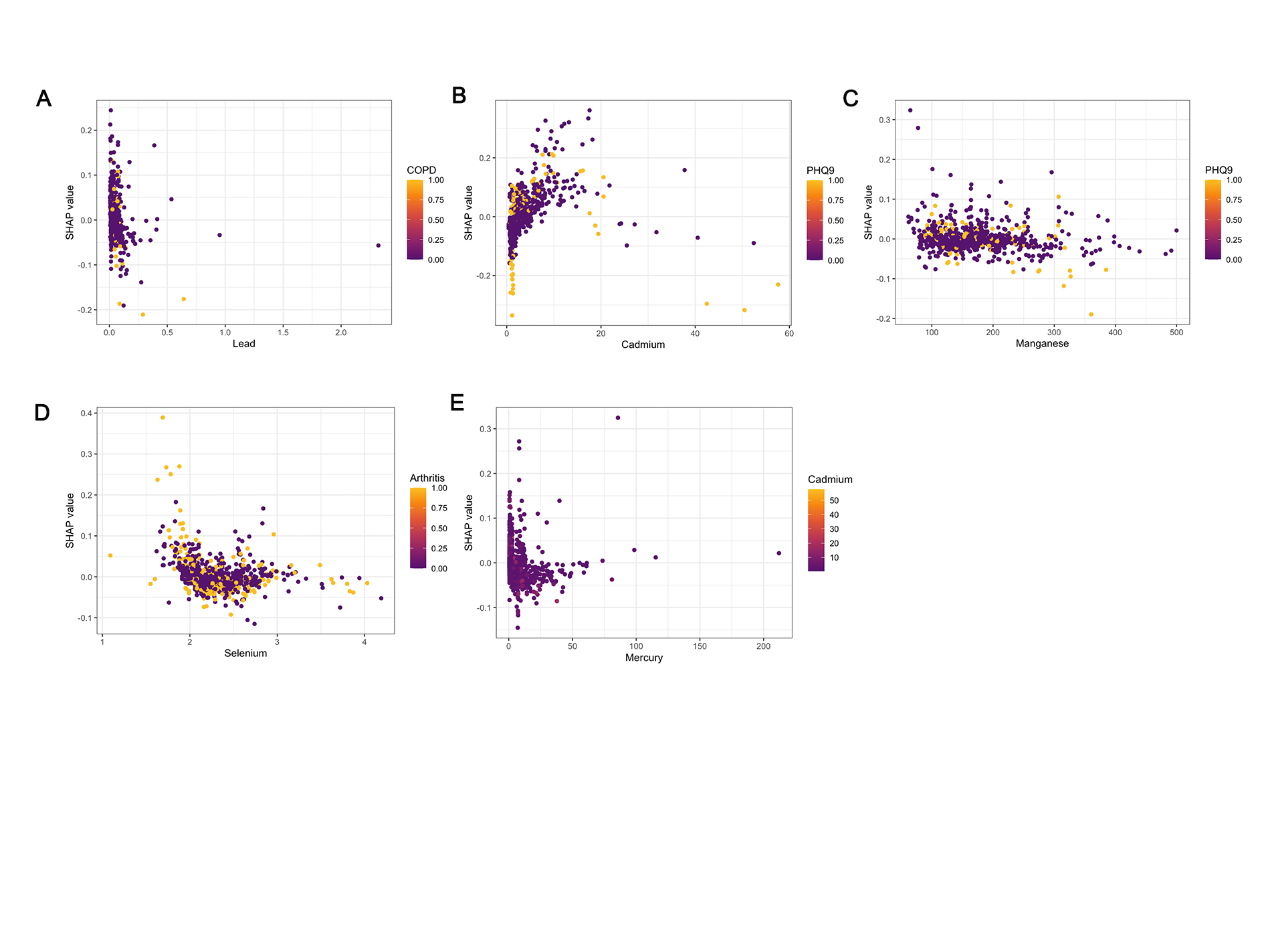


Figure S6. SHAP Waterfall Plots Illustrating the Contribution of Heavy Metal Exposure and Clinical Features to Predicted Risk Scores in Stroke Survivors (1, 10, 100, 1000)


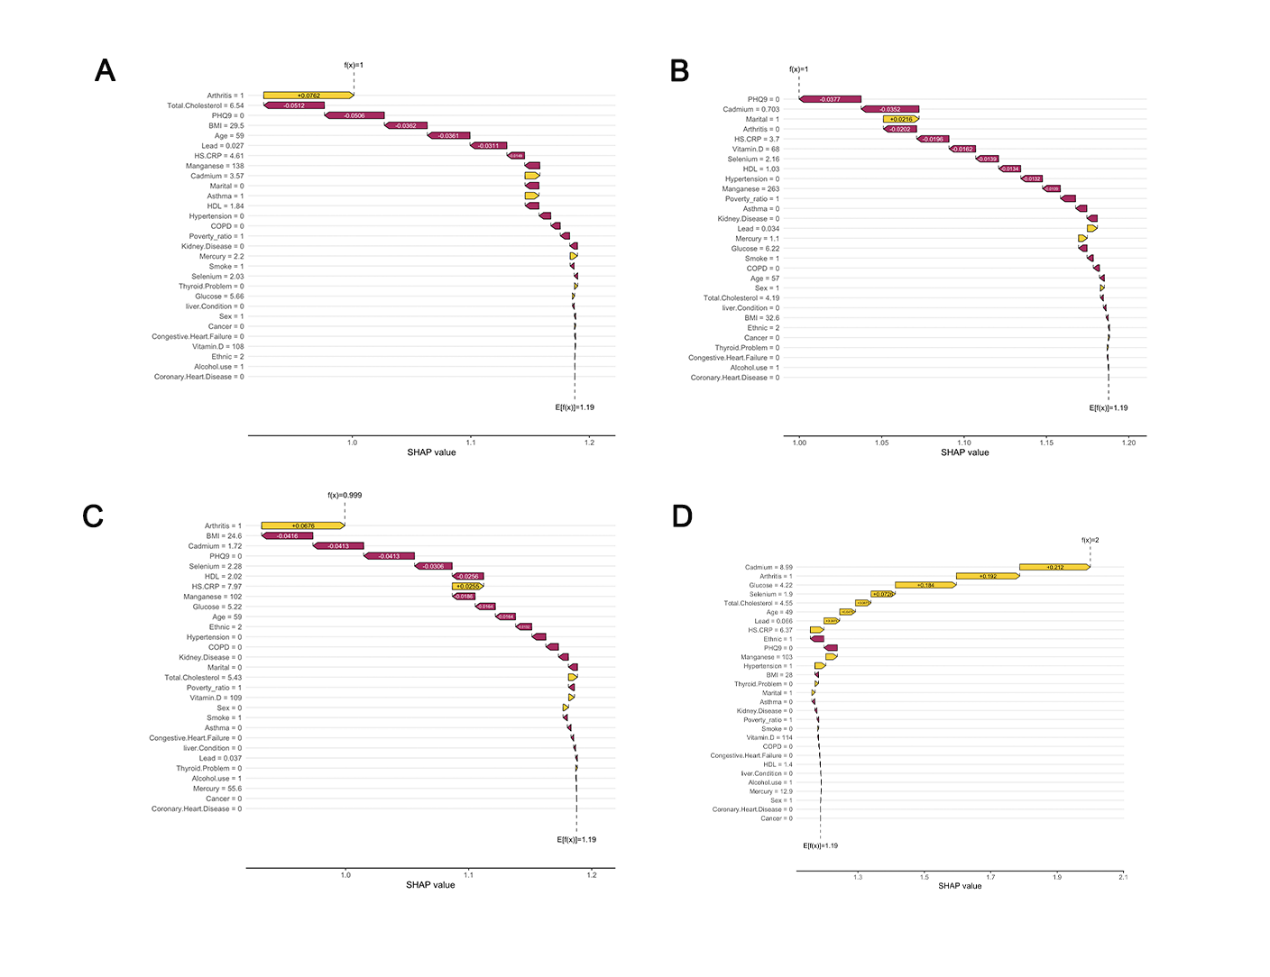


Figure S7. SHAP Summary Plot Showing Feature Contributions to Predicted Risk in Stroke Survivors with and Without Adverse Outcomes 1, 10, 100, 1000


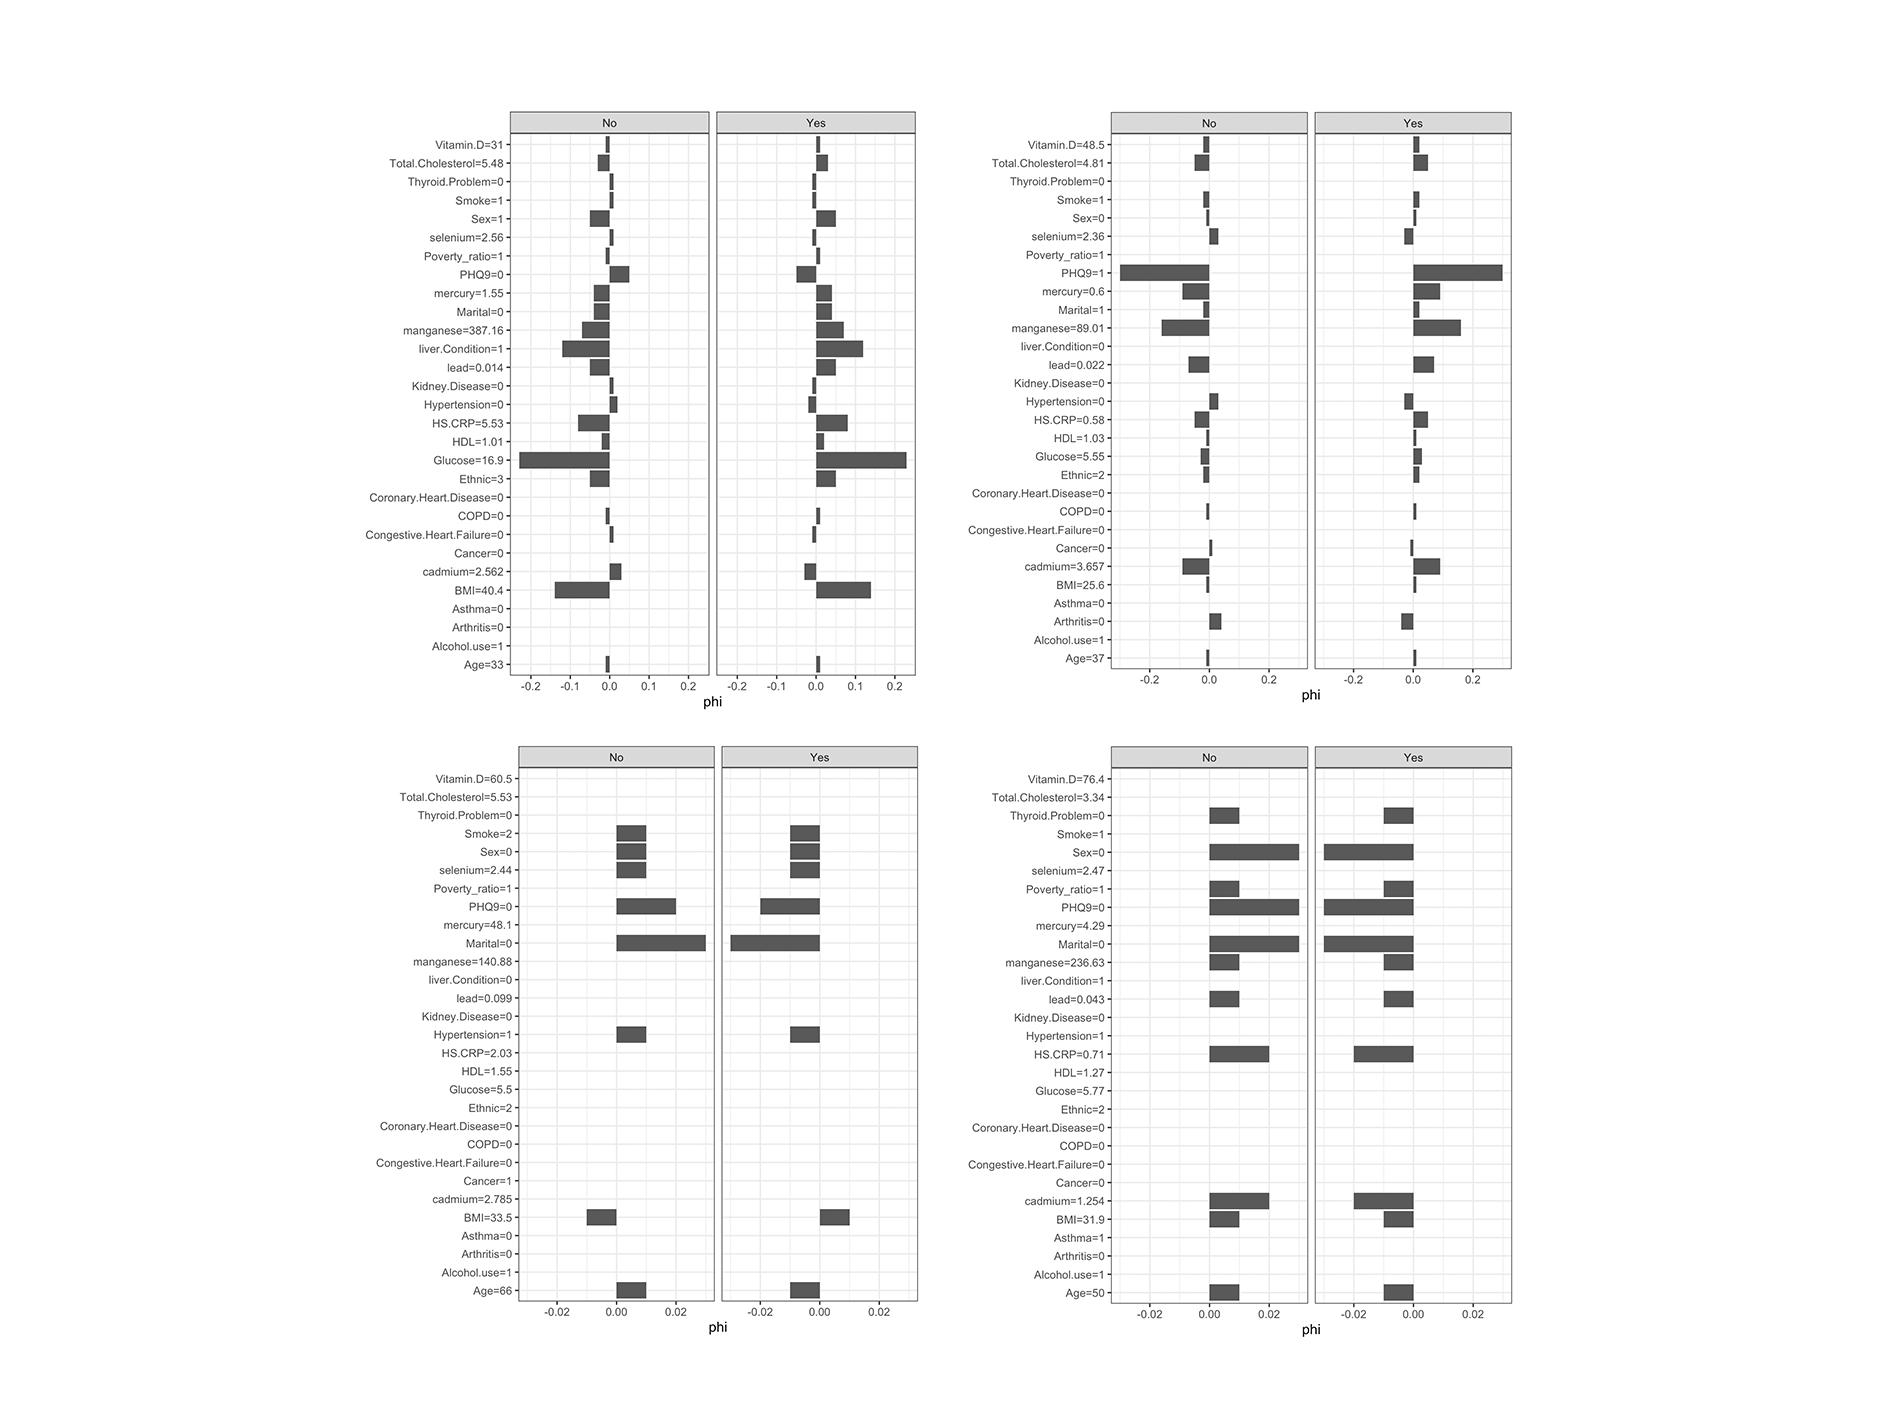

Supplement: Supplementary file 1 [file 674dbc6a250c494d29441982.docx]
